# Supplementary material
Source: HighWire-hosted journal article supplement (https://bmjopen.bmj.com/content/12/4/e058312)
Supplement: inline-supplementary-material-1 [file inline-supplementary-material-1.pdf]

**Supplementary file****Figure S1:** Annual valproate prevalent prescribing rates per 10,000 population in females by age group 2011-2019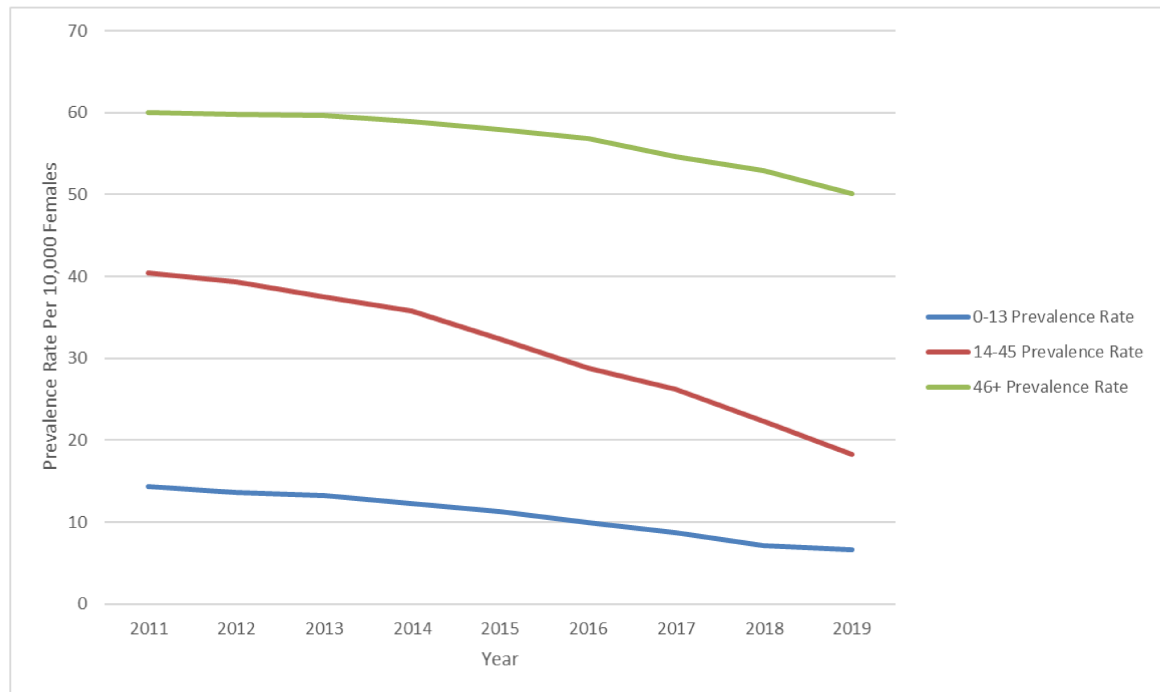**Figure S2:** Annual valproate incident prescribing rates per 10,000 population in females by age group 2011-2019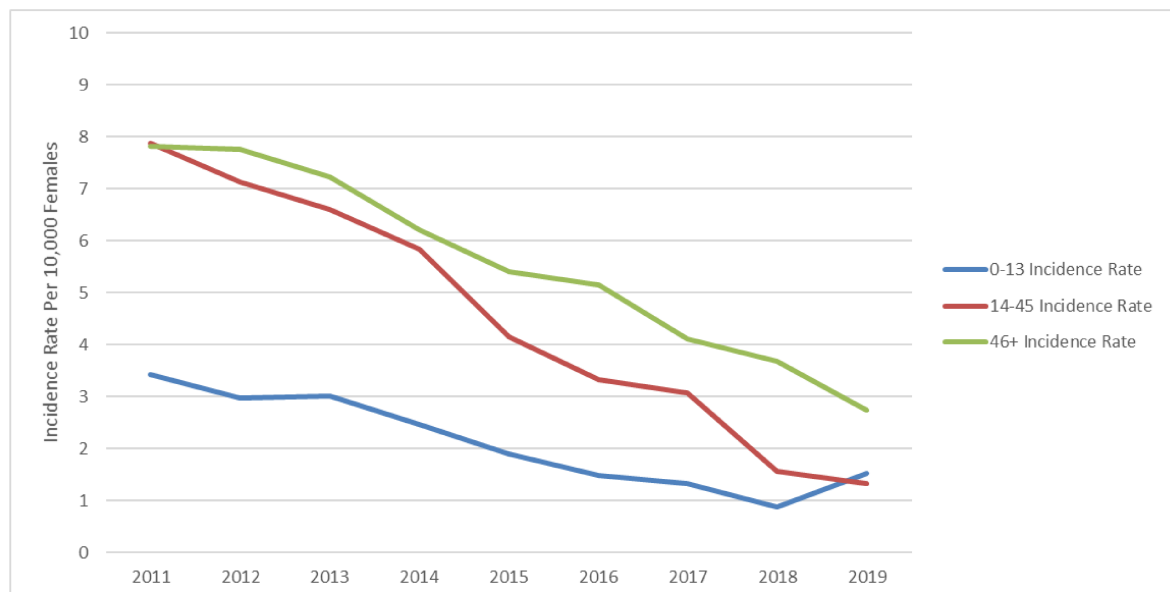

**Table S1:** Sensitivity analysis for valproate exposed pregnancies by pregnancy outcome

| <b>Valproate exposure criteria</b> | <b>Total</b>    | <b>Live Birth</b> | <b>Stillbirth</b> | <b>Miscarriage</b> | <b>Termination</b> |
|------------------------------------|-----------------|-------------------|-------------------|--------------------|--------------------|
| During pregnancy                   | 365             | 274               | 0                 | 27                 | 64                 |
| During pregnancy or 30 days prior  | 419<br>(+14.8%) | 297<br>(+8.4%)    | 0<br>(+0%)        | 28<br>(+3.7%)      | 94<br>(+46.9%)     |
| During pregnancy or 60 days prior  | 455<br>(+24.7%) | 319<br>(+16.4%)   | 0<br>(+0%)        | 29<br>(+7.4%)      | 107<br>(+67.2%)    |
